# Supplementary material for: New strategy to rescue the inhibition of osteogenesis of human bone marrow-derived mesenchymal stem cells under oxidative stress: combination of vitamin C and graphene foams
Source: PubMed Central journal article supplement (PMC5342139; doi:10.18632/oncotarget.12456), 2016-10-04
Supplement: oncotarget-07-71998-s001.pdf [file oncotarget-07-71998-s001.pdf]

## New strategy to rescue the inhibition of osteogenesis of human bone marrow-derived mesenchymal stem cells under oxidative stress: combination of vitamin C and graphene foams

### Supplementary Materials

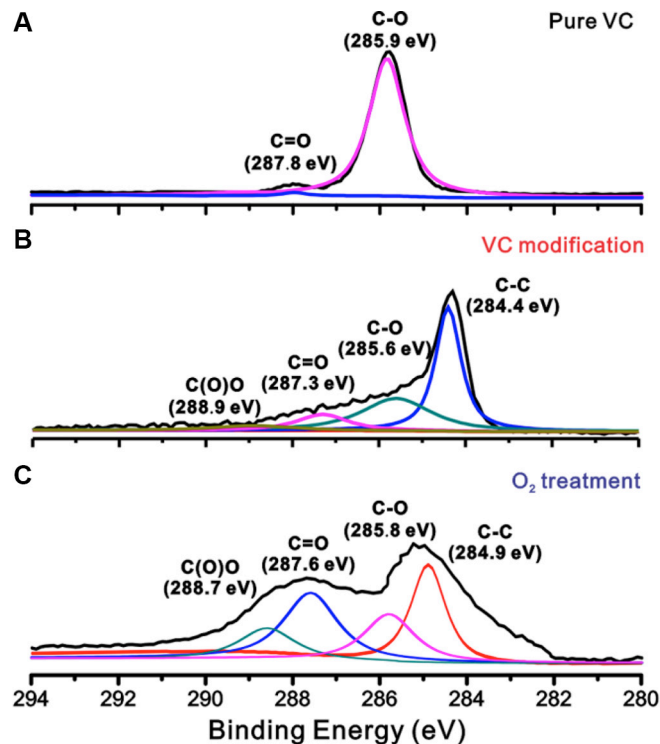

**Supplementary Figure S1: High-resolution C (1s) XPS of Pure VC, VC modified GF and O<sub>2</sub> plasma-treated GF.** The X-ray photoelectron spectroscopy (XPS) (Axis Ultra DLD, Kratos) was measured by utilizing an Al K $\alpha$  X-ray source operated at 40 eV.

### Supplementary Table S1: Primers for RT-PCR in this study

| genes          | forward                  | reverse                      |
|----------------|--------------------------|------------------------------|
| <i>Runx2</i>   | 5'-TCTTAGAACAATCTGCCCTTT | 5'-TGCTTTGGTCTTGAAATCACA     |
| <i>Osx</i>     | 5'-CCTCCTCAGCTCACCTTCTC  | 5'-TTGGGAGCCCAAATAGAAA       |
| <i>Sox-2</i>   | 5'-GCCTGGGCGCCGAGTGGA    | 5'-GGGCGAGCCGTTTCATGTAGGTCTG |
| <i>oct-4</i>   | 5'-AGGTGTTTCAGCCAAACGACC | 5'-TGATCGTTTGCCTTCTGTC       |
| <i>nanog</i>   | 5'-ATCCAGCTTGTCCTCCAAAG  | 5'-ATTTTCATTCGCTGGTTCTGG     |
| $\beta$ -actin | 5'-CAATGTGGCCGAGGACTTTG  | 5'-CATTCTCCTTAGAGAGAAGTGG    |
